# Supplementary material for: Burden of Traumatic Brain Injuries in Children and Adolescents in Europe: Hospital Discharges, Deaths and Years of Life Lost
Source: MDPI journal article supplement (doi:10.3390/children9010105), 2022-01-13
Supplement: s1 [file s1]

**Table S2.** Availability of the data on hospital discharges and deaths due to TBI per country.

| <b>Country<br/>(Total 33)</b>                     | <b>Hospital discharges</b> | <b>Hospital discharges including<br/>separate data on day-cases and in-<br/>patient data)</b> | <b>Deaths</b> |
|---------------------------------------------------|----------------------------|-----------------------------------------------------------------------------------------------|---------------|
| <b>Austria</b>                                    | Yes                        | Yes                                                                                           | Yes           |
| <b>Belgium</b>                                    | Yes                        | Yes                                                                                           | Yes           |
| <b>Bulgaria</b>                                   | Not available              | Not available                                                                                 | Yes           |
| <b>Croatia</b>                                    | Yes                        | Yes                                                                                           | Yes           |
| <b>Cyprus</b>                                     | Yes                        | Yes                                                                                           | Yes           |
| <b>Czech Republic</b>                             | Yes                        | Yes                                                                                           | Yes           |
| <b>Denmark</b>                                    | Yes                        | Yes                                                                                           | Yes           |
| <b>Estonia</b>                                    | Not available              | Not available                                                                                 | Yes           |
| <b>Finland</b>                                    | Yes                        | Yes                                                                                           | Yes           |
| <b>France</b>                                     | Yes                        | Yes                                                                                           | Not available |
| <b>Germany</b>                                    | Yes                        | Yes                                                                                           | Yes           |
| <b>Greece</b>                                     | Not available              | Not available                                                                                 | Yes           |
| <b>Hungary</b>                                    | Yes                        | Yes                                                                                           | Yes           |
| <b>Iceland</b>                                    | Yes                        | Not available                                                                                 | Yes           |
| <b>Ireland</b>                                    | Yes                        | Yes                                                                                           | Yes           |
| <b>Italy</b>                                      | Yes                        | Yes                                                                                           | Yes           |
| <b>Latvia</b>                                     | Yes                        | Yes                                                                                           | Yes           |
| <b>Lithuania</b>                                  | Yes                        | Yes                                                                                           | Yes           |
| <b>Luxembourg</b>                                 | Yes                        | Yes                                                                                           | Yes           |
| <b>Malta</b>                                      | Yes                        | Yes                                                                                           | Yes           |
| <b>Netherlands</b>                                | Yes                        | Yes                                                                                           | Yes           |
| <b>Norway</b>                                     | Yes                        | Yes                                                                                           | Yes           |
| <b>Poland</b>                                     | Yes                        | Yes                                                                                           | Not available |
| <b>Portugal</b>                                   | Yes                        | Yes                                                                                           | Yes           |
| <b>Romania</b>                                    | Yes                        | Yes                                                                                           | Yes           |
| <b>Serbia</b>                                     | Yes                        | Yes                                                                                           | Yes           |
| <b>Slovakia</b>                                   | Yes                        | Yes                                                                                           | Yes           |
| <b>Slovenia</b>                                   | Yes                        | Yes                                                                                           | Yes           |
| <b>Spain</b>                                      | Yes                        | Yes                                                                                           | Not available |
| <b>Sweden</b>                                     | Yes                        | Yes                                                                                           | Yes           |
| <b>Switzerland</b>                                | Yes                        | Not available                                                                                 | Yes           |
| <b>Turkey</b>                                     | Yes                        | Not available                                                                                 | Yes           |
| <b>United Kingdom</b>                             | Yes                        | Yes                                                                                           | Yes           |
| <b>Total of countries with data<br/>available</b> | <b>30</b>                  | <b>27</b>                                                                                     | <b>30</b>     |
