# Supplementary material for: Burden of Traumatic Brain Injuries in Children and Adolescents in Europe: Hospital Discharges, Deaths and Years of Life Lost
Source: MDPI journal article supplement (doi:10.3390/children9010105), 2022-01-13
Supplement: s1 [file s1]

**Table S5.** Estimated numbers of hospital discharges, deaths and YLLs due to TBI extrapolated to the population of 0–19 years old in the European Union for 2014, by sex.

|                                                    | <b>Pooled crude rate (95% CI)</b> | <b>Estimated number of cases (95% CI)</b> |
|----------------------------------------------------|-----------------------------------|-------------------------------------------|
| <b>Boys</b>                                        |                                   |                                           |
| <b>Hospital discharges due to TBI – overall</b>    | 414.4 (338.0–491.0)               | 226,279 (184,561–268,105)                 |
| <b>Hospital discharges – intracranial injuries</b> | 177.7 (138.7–216.7)               | 97,031 (75,736–118,327)                   |
| <b>Hospital discharges – other head injuries</b>   | 236.7 (186.5–286.9)               | 129,248 (101,836–156,659)                 |
| <b>Deaths due to TBI</b>                           | 4.0 (3.3–4.6)                     | 2184 (1802–2512)                          |
| <b>YLLs due to TBI</b>                             | 248.7 (198.5–298.9)               | 135,800 (108,389–163,211)                 |
| <b>Girls</b>                                       |                                   |                                           |
| <b>Hospital discharges due to TBI – overall</b>    | 278.0 (209.8–346.2)               | 144,110 (108,757–179,464)                 |
| <b>Hospital discharges – intracranial injuries</b> | 133.3 (107.1–159.5)               | 69,100 (55,519–82,682)                    |
| <b>Hospital discharges – other head injuries</b>   | 144.7 (115.4–173.9)               | 75,010 (59,821–90,147)                    |
| <b>Deaths due to TBI</b>                           | 1.7 (1.3–2.1)                     | 881 (674–1,089)                           |
| <b>YLLs due to TBI</b>                             | 120.3 (92.1–148.4)                | 62,361 (47,743–76,928)                    |

For extrapolation, the population estimate of 0–19 years old in the European Union for 2014 was used (population count: boys 54,603,941, girls 51,838,271).
