# Supplementary material for: Burden of Traumatic Brain Injuries in Children and Adolescents in Europe: Hospital Discharges, Deaths and Years of Life Lost
Source: MDPI journal article supplement (doi:10.3390/children9010105), 2022-01-13
Supplement: s1 [file s1]

**Table S3.** Sex ratios of hospital discharges, deaths and YLLs by country.

| <b>Country</b>        | <b>Hospital discharges</b> | <b>Deaths</b>        | <b>Years of life lost</b> |
|-----------------------|----------------------------|----------------------|---------------------------|
| <b>Austria</b>        | 1.3 (1.3–1.4)              | 3.9 (2.9–5.4)        | 4.6 (4.2–5.0)             |
| <b>Belgium</b>        | 1.4 (1.4–1.5)              | 2.5 (1.8–3.4)        | 2.6 (2.4–2.9)             |
| <b>Bulgaria</b>       | not available              | 2.6 (2.0–3.3)        | 2.3 (2.2–2.5)             |
| <b>Croatia</b>        | 1.5 (1.4–1.7)              | 3.0 (2.1–4.5)        | 2.5 (2.2–2.7)             |
| <b>Cyprus</b>         | 1.7 (1.5–2.0)              | 2.3 (1.0–5.6)        | 3.1 (2.6–3.7)             |
| <b>Czech Republic</b> | 1.4 (1.3–1.4)              | 2.9 (2.0–4.2)        | 3.7 (3.4–4.0)             |
| <b>Denmark</b>        | 1.4 (1.3–1.5)              | 2.6 (1.4–5.0)        | 2.2 (2.0–2.5)             |
| <b>Estonia</b>        | not available              | 4.8 (2.7–9.4)        | 1.1 (1.0–1.3)             |
| <b>Finland</b>        | 1.5 (1.4–1.6)              | 2.5 (1.8–3.5)        | 3.0 (2.8–3.3)             |
| <b>France</b>         | 1.6 (1.6–1.6)              | not available        | not available             |
| <b>Germany</b>        | 1.2 (1.2–1.2)              | 2.3 (2.0–2.7)        | 2.1 (2.0–2.2)             |
| <b>Greece</b>         | not available              | 3.3 (2.5–4.4)        | 3.2 (3.0–3.4)             |
| <b>Hungary</b>        | 1.3 (1.2– 1.4)             | 2.3 (1.6–3.5)        | 1.2 (1.1–1.3)             |
| <b>Iceland</b>        | 2.1 (1.2–3.9)              | 0.9 (0.2–5.4)        | 0.9 (0.6–1.2)             |
| <b>Ireland</b>        | 1.7 (1.6–1.8)              | 4.2 (2.3–8.5)        | 3.5 (3.0–4.0)             |
| <b>Italy</b>          | 1.8 (1.8–1.9)              | 2.2 (1.8–2.6)        | 2.3 (2.2–2.4)             |
| <b>Latvia</b>         | 1.6 (1.4–1.7)              | 2.2 (1.4–3.8)        | 1.6 (1.4–1.9)             |
| <b>Lithuania</b>      | 1.6 (1.5–1.7)              | 2.5 (1.9–3.4)        | 1.5 (1.4–1.6)             |
| <b>Luxembourg</b>     | 1.6 (1.1–2.3)              | 1.8 (0.7–5.4)        | –                         |
| <b>Malta</b>          | 1.6 (1.3–2.0)              | 0.9 (0.1–9.0)        | 1.7 (1.3–2.4)             |
| <b>Netherlands</b>    | 1.3 (1.3–1.4)              | 1.7 (1.3–2.3)        | 2.1 (2.0–2.3)             |
| <b>Norway</b>         | 1.4 (1.3–1.5)              | 1.9 (1.1–3.4)        | 3.2 (2.8–3.6)             |
| <b>Poland</b>         | 1.5 (1.5–1.6)              | not available        | not available             |
| <b>Portugal</b>       | 1.9 (1.7–2.2)              | 3.5 (2.2–5.8)        | 2.6 (2.3–2.8)             |
| <b>Romania</b>        | 2.0 (1.9–2.0)              | 2.4 (2.0–2.8)        | 2.1 (2.0–2.2)             |
| <b>Serbia</b>         | 2.0 (1.8–2.1)              | 4.0 (2.4–7.1)        | 2.5 (2.2–2.8)             |
| <b>Slovakia</b>       | 1.5 (1.4–1.6)              | 1.8 (1.2–2.8)        | 1.5 (1.3–1.7)             |
| <b>Slovenia</b>       | 1.5 (1.4–1.6)              | 1.9 (0.9–3.9)        | 0.8 (0.7–0.9)             |
| <b>Spain</b>          | 1.9 (1.8–2.0)              | not available        | not available             |
| <b>Sweden</b>         | 1.3 (1.2–1.3)              | 1.5 (1.0–2.2)        | 1.7 (1.5–1.8)             |
| <b>Switzerland</b>    | 1.3 (1.2–1.3)              | 1.9 (1.4–2.6)        | 1.0 (0.9–1.0)             |
| <b>Turkey</b>         | 2.2 (2.1–2.2)              | 2.3 (2.2–2.5)        | 2.0 (1.9–2.0)             |
| <b>United Kingdom</b> | 1.7 (1.6–1.7)              | 2.3 (2.0–2.6)        | 1.5 (1.5–1.6)             |
| <b>Average</b>        | <b>2.4 (2.3–2.5)</b>       | <b>1.5 (1.5–1.5)</b> | <b>2.0 (2.0–2.0)</b>      |
