# Supplementary material for: Burden of Traumatic Brain Injuries in Children and Adolescents in Europe: Hospital Discharges, Deaths and Years of Life Lost
Source: MDPI journal article supplement (doi:10.3390/children9010105), 2022-01-13
Supplement: s1 [file s1]

**Table S4.** Proportions (%) of external causes of death due to TBI in 0–19 years old in 30 European countries by country, both sexes combined, in 2014.

| Countries             | Traffic   | Falls    | Suicide  | Violence | Other     |
|-----------------------|-----------|----------|----------|----------|-----------|
| <b>Austria</b>        | 68        | 0        | 16       | 4        | 12        |
| <b>Belgium</b>        | 55        | 13       | 10       | 8        | 15        |
| <b>Bulgaria</b>       | 44        | 21       | 8        | 5        | 23        |
| <b>Croatia</b>        | 80        | 0        | 0        | 20       | 0         |
| <b>Cyprus</b>         | 62        | 4        | 12       | 0        | 22        |
| <b>Czech Republic</b> | 70        | 5        | 12       | 5        | 8         |
| <b>Denmark</b>        | 57        | 14       | 24       | 5        | 0         |
| <b>Estonia</b>        | 71        | 14       | 14       | 0        | 0         |
| <b>Finland</b>        | 50        | 4        | 21       | 14       | 11        |
| <b>Germany</b>        | 71        | 7        | 7        | 2        | 13        |
| <b>Greece</b>         | 65        | 10       | 15       | 10       | 0         |
| <b>Hungary</b>        | 72        | 4        | 0        | 0        | 24        |
| <b>Italy</b>          | 64        | 11       | 4        | 9        | 13        |
| <b>Ireland</b>        | 93        | 0        | 0        | 0        | 7         |
| <b>Iceland</b>        | 100       | 0        | 0        | 0        | 0         |
| <b>Latvia</b>         | 74        | 6        | 9        | 3        | 9         |
| <b>Lithuania</b>      | 69        | 7        | 0        | 3        | 21        |
| <b>Luxembourg</b>     | 100       | 0        | 0        | 0        | 0         |
| <b>Malta</b>          | 70        | 0        | 0        | 10       | 20        |
| <b>Netherlands</b>    | 74        | 0        | 12       | 3        | 10        |
| <b>Norway</b>         | 33        | 33       | 33       | 0        | 0         |
| <b>Portugal</b>       | 39        | 17       | 17       | 11       | 17        |
| <b>Romania</b>        | 73        | 6        | 9        | 0        | 12        |
| <b>Serbia</b>         | 72        | 8        | 0        | 3        | 17        |
| <b>Slovakia</b>       | 78        | 4        | 0        | 4        | 15        |
| <b>Slovenia</b>       | 53        | 6        | 28       | 6        | 6         |
| <b>Sweden</b>         | 25        | 0        | 25       | 25       | 25        |
| <b>Switzerland</b>    | 59        | 6        | 6        | 0        | 29        |
| <b>Turkey</b>         | 56        | 7        | 5        | 3        | 29        |
| <b>United Kingdom</b> | 67        | 4        | 3        | 3        | 23        |
| <b>Total</b>          | <b>63</b> | <b>7</b> | <b>7</b> | <b>4</b> | <b>19</b> |

See Supplementary Table S1 for definitions of external cause groups.
