# Supplementary material for: Burden of Traumatic Brain Injuries in Children and Adolescents in Europe: Hospital Discharges, Deaths and Years of Life Lost
Source: MDPI journal article supplement (doi:10.3390/children9010105), 2022-01-13
Supplement: s1 [file s1]

A

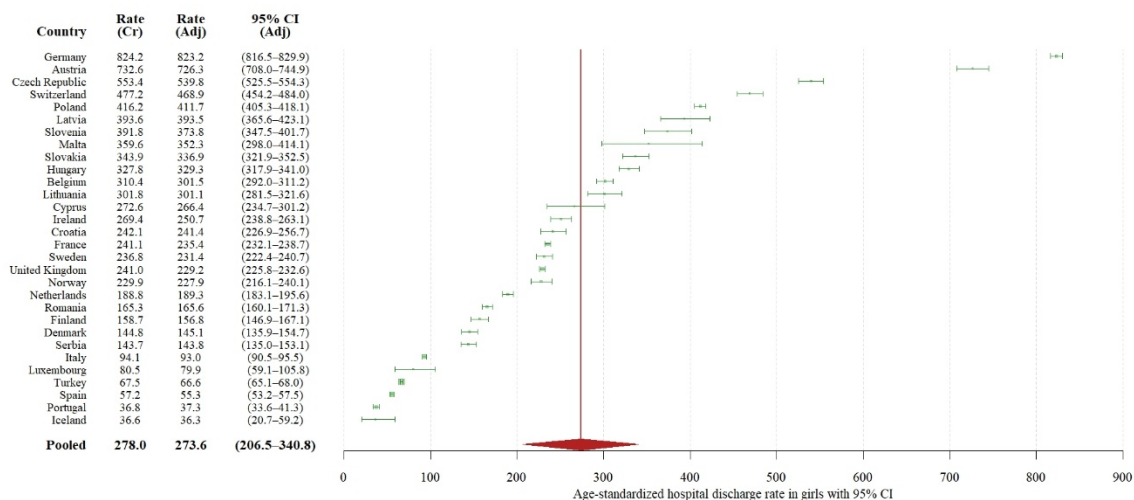

B

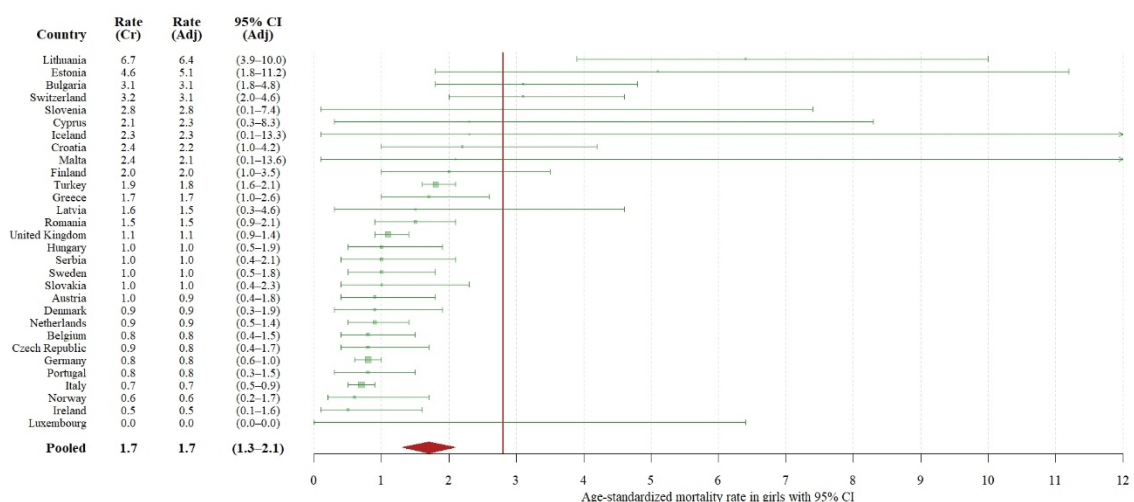

C

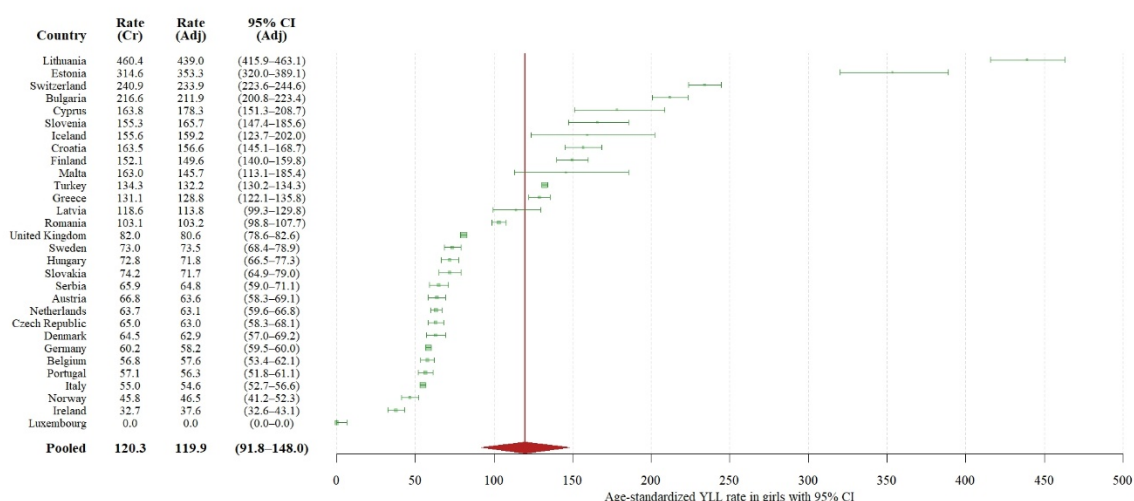

**Figure S3.** Crude and age-standardized rates of TBI-related hospital discharges (A), deaths (B) and YLLs (C) with estimated pooled rates for the analyzed 30 European countries in 2014, girls.
