# Supplementary material for: Burden of Traumatic Brain Injuries in Children and Adolescents in Europe: Hospital Discharges, Deaths and Years of Life Lost
Source: MDPI journal article supplement (doi:10.3390/children9010105), 2022-01-13
Supplement: s1 [file s1]

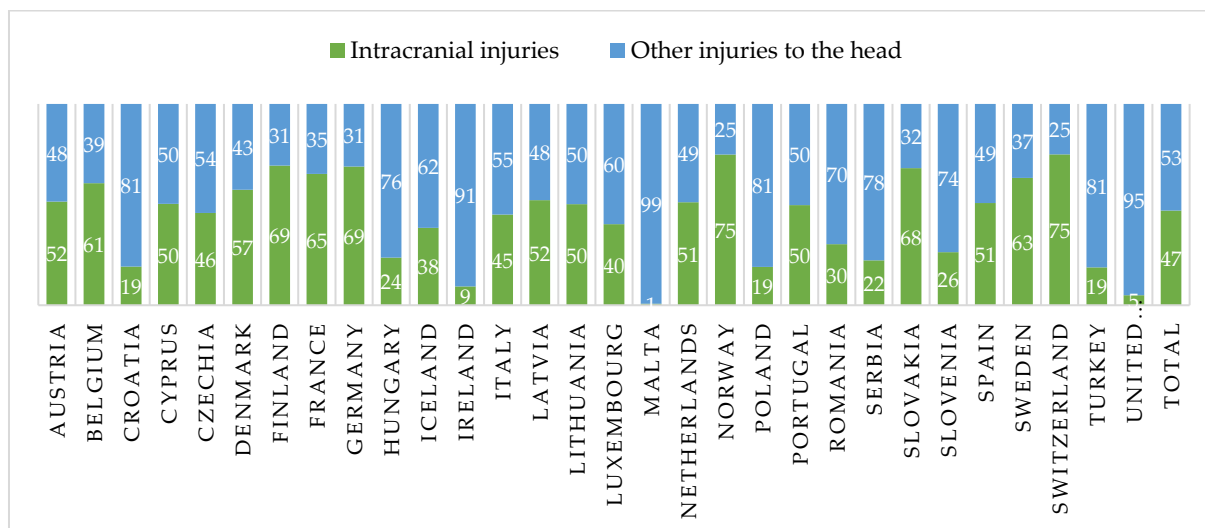

**Figure S1.** Proportions of intracranial injuries (ISHMT 1901) and other head injuries (ISHMT 1902) in 0–19 years old in 30 European countries by country, both sexes combined, in 2014.

*ISHMT: International Shortlist for Hospital Morbidity Tabulation.*
