# Supplementary material for: Burden of Traumatic Brain Injuries in Children and Adolescents in Europe: Hospital Discharges, Deaths and Years of Life Lost
Source: MDPI journal article supplement (doi:10.3390/children9010105), 2022-01-13
Supplement: s1 [file s1]

**Table S1.** Case definitions of TBI related deaths, external causes of deaths and hospital discharges due to TBI.

| ICD-10 codes used to define TBI in the causes of death dataset |                                                        | ICD-10 codes used to define external causes of injury in fatal TBI |                                                                |
|----------------------------------------------------------------|--------------------------------------------------------|--------------------------------------------------------------------|----------------------------------------------------------------|
| S00                                                            | Superficial injury of head                             | V01–V99                                                            | Transport accidents                                            |
| S01                                                            | Open wound of head                                     | W00–W19                                                            | Falls                                                          |
| S02                                                            | Fracture of skull and facial bones                     | X60–X84                                                            | Intentional self-harm                                          |
| S03                                                            | Dislocation and sprain of joints and ligaments of head | X85–Y09                                                            | Assault                                                        |
| S04                                                            | Injury of cranial nerve                                | Y10–Y89                                                            | Other                                                          |
| S05                                                            | Injury of eye and orbit                                |                                                                    |                                                                |
| S06                                                            | Intracranial injury                                    | IHMT categories used to define TBI in hospital discharges          |                                                                |
| S07                                                            | Crushing injury of head                                |                                                                    |                                                                |
| S08                                                            | Avulsion and traumatic amputation of part of head      | ISHMT 1901                                                         | Intracranial injuries, includes ICD-10 code S06                |
| S09                                                            | Other and unspecified injuries of head                 | ISHMT 1902                                                         | Other head injuries, includes ICD-10 codes S00–S05 and S07–S09 |
| T90                                                            | Sequelae of injuries of head                           |                                                                    |                                                                |

ISHMT: International Shortlist for Hospital Morbidity Tabulation.
